# Supplementary material for: IGHV1 usage is associated with lymphadenopathy and aggressive disease in the TCL1 mouse model for chronic lymphocytic leukemia
Source: Research Square preprint supplement (doi:10.21203/rs.3.rs-6647193/v1), 2025-07-01
Supplement: Supplementary file 1 [file 0530c13e8379c982eeca899f.xlsx]

## Sheet: Supplement table 1
Supplement table 1: A list of all TCL1 mice used throughout the manuscript
ID	sex	birthday	sacrifice day	genotype	organ	survival (days)	IGHV gene of dominant clone	VH mutation status of dominant clone	lymph node size (cm)
29	f	2012-11-08	2013-10-23	C57BL/6J Eµ-TCL1	spleen	349	IGHV11-2	Unmutated	NA
68	f	2013-04-15	2014-01-16	C57BL/6J Eµ-TCL1	peritoneal cavity	276	IGHV11-2	Unmutated	NA
74	m	2013-04-15	2014-02-11	C57BL/6J Eµ-TCL1	spleen	302	IGHV11-2	Unmutated	0.182
92	f	2013-07-22	2014-09-30	C57BL/6J Eµ-TCL1	heart blood	435	IGHV11-2	Unmutated	0.195
96	m	2013-07-22	2014-08-24	C57BL/6J Eµ-TCL1	peritoneal cavity	398	IGHV1-55	Unmutated	0.232
107	f	2013-08-04	2014-05-07	C57BL/6J Eµ-TCL1	spleen	276	IGHV1-52	Unmutated	0.329
109	f	2013-08-04	2014-06-03	C57BL/6J Eµ-TCL1	peritoneal cavity	303	IGHV1-55	Unmutated	0.844
117	m	2013-09-29	2014-07-29	C57BL/6J Eµ-TCL1	spleen	303	IGHV2-2	Unmutated	NA
121	m	2013-09-29	2015-01-26	C57BL/6J Eµ-TCL1	bone marrow	484	IGHV6-3	Unmutated	NA
141	f	2014-01-02	2015-02-10	C57BL/6J Eµ-TCL1	heart blood	404	IGHV11-2	Unmutated	NA
220	m	2014-09-20	2015-10-13	C57BL/6J Eµ-TCL1	spleen	388	IGHV11-2	Unmutated	NA
238	f	2015-02-15	2016-02-23	C57BL/6J Eµ-TCL1	heart blood	373	IGHV7-3	Unmutated	NA
241	f	2015-03-05	2016-03-16	C57BL/6J Eµ-TCL1	heart blood	377	IGHV12-3	Unmutated	NA
254	f	2015-04-28	2016-02-29	C57BL/6J Eµ-TCL1	spleen	307	IGHV5-16	Unmutated	NA
288	m	2015-08-10	2016-06-23	C57BL/6J Eµ-TCL1	heart blood	318	IGHV12-3	Unmutated	NA
290	m	2015-08-10	2016-06-13	C57BL/6J Eµ-TCL1	heart blood	308	IGHV12-3	Unmutated	NA
292	f	2015-08-13	2016-09-09	C57BL/6J Eµ-TCL1	spleen	393	IGHV11-2	Unmutated	NA
301	m	2015-08-13	2016-11-02	C57BL/6J Eµ-TCL1	heart blood	447	IGHV5-17	Unmutated	NA
317	f	2016-02-11	2017-02-01	C57BL/6J Eµ-TCL1	spleen	356	IGHV5-6	Unmutated	NA
318	f	2016-02-11	2017-03-22	C57BL/6J Eµ-TCL1	spleen	405	IGHV12-3	Unmutated	NA
354	m	2016-02-25	2017-02-03	C57BL/6J Eµ-TCL1	spleen	344	IGHV11-2	Unmutated	0.105
356	f	2016-05-31	2017-03-22	C57BL/6J Eµ-TCL1	spleen	295	IGHV11-2	Unmutated	0.303
374	m	2016-06-24	2017-06-23	C57BL/6J Eµ-TCL1	spleen	364	IGHV11-2	Unmutated	0.137
405	m	2016-11-21	2017-11-02	C57BL/6J Eµ-TCL1	spleen	346	IGHV11-2	Unmutated	0.483
420	m	2016-11-18	2017-06-20	C57BL/6J Eµ-TCL1	spleen	214	IGHV11-2	Unmutated	0.203
421	f	2016-12-02	2017-07-28	C57BL/6J Eµ-TCL1	heart blood	238	IGHV1-81	Unmutated	0.211
431	f	2017-03-27	2018-03-26	C57BL/6J Eµ-TCL1	spleen	364	IGHV1-52	Unmutated	0.481
449	m	2017-03-27	2018-07-12	C57BL/6J Eµ-TCL1	spleen	472	IGHV11-2	Unmutated	0.267
457	f	2017-04-18	2018-03-27	C57BL/6J Eµ-TCL1	spleen	343	IGHV1-81	Unmutated	0.491
473	m	2017-06-04	2018-04-20	C57BL/6J Eµ-TCL1	spleen	320	IGHV11-2	Unmutated	0.242
482	f	2017-08-24	2018-06-11	C57BL/6J Eµ-TCL1	spleen	291	IGHV1-55	Unmutated	0.507
483	m	2017-08-24	2018-08-02	C57BL/6J Eµ-TCL1	spleen	343	IGHV5-9	Unmutated	NA
484	m	2017-08-24	2018-08-01	C57BL/6J Eµ-TCL1	heart blood	342	IGHV1-77	Unmutated	NA
487	f	2017-08-25	2018-09-12	C57BL/6J Eµ-TCL1	spleen	383	IGHV11-2	Unmutated	NA
495	f	2017-10-05	2018-09-12	C57BL/6J Eµ-TCL1	spleen	342	IGHV11-2	Unmutated	0.359
506	f	2017-10-18	2018-11-05	C57BL/6J Eµ-TCL1	spleen	383	IGHV11-2	Unmutated	0.595
508	m	2017-10-18	2018-10-31	C57BL/6J Eµ-TCL1	spleen	378	IGHV11-2	Unmutated	0.214
516	f	2017-10-28	2018-07-27	C57BL/6J Eµ-TCL1	spleen	272	IGHV1-74	Unmutated	0.407
518	m	2017-10-28	2018-10-08	C57BL/6J Eµ-TCL1	spleen	345	IGHV11-2	Unmutated	0.246
521	f	2017-10-29	2018-08-06	C57BL/6J Eµ-TCL1	spleen	281	IGHV1-71	Unmutated	0.698
529	f	2018-02-19	2019-03-04	C57BL/6J Eµ-TCL1	spleen	378	IGHV11-2	Unmutated	0.239
530	f	2018-02-19	2019-03-11	C57BL/6J Eµ-TCL1	spleen	385	IGHV11-2	Unmutated	0.549
531	f	2018-02-19	2019-01-14	C57BL/6J Eµ-TCL1	spleen	329	IGHV1-55	Unmutated	0.242
535	m	2018-02-19	2019-05-24	C57BL/6J Eµ-TCL1	spleen	459	IGHV11-2	Unmutated	0.384
537	f	2018-03-03	2018-12-27	C57BL/6J Eµ-TCL1	spleen	299	IGHV1-55	Unmutated	0.454
544	m	2018-03-05	2019-02-20	C57BL/6J Eµ-TCL1	spleen	352	IGHV1-76	Unmutated	0.468
548	m	2018-03-05	2019-03-05	C57BL/6J Eµ-TCL1	spleen	365	IGHV11-2	Unmutated	0.324
559	m	2018-05-20	2019-08-09	C57BL/6J Eµ-TCL1	spleen	446	IGHV7-4	Unmutated	NA
562	m	2018-05-20	2019-07-19	C57BL/6J Eµ-TCL1	spleen	425	IGHV1-55	Unmutated	0.214
564	f	2018-05-25	2019-06-07	C57BL/6J Eµ-TCL1	spleen	378	IGHV11-2	Unmutated	0.315
568	m	2018-05-25	2019-07-12	C57BL/6J Eµ-TCL1	spleen	413	IGHV12-3	Unmutated	NA
573	f	2018-06-09	2019-08-11	C57BL/6J Eµ-TCL1	spleen	428	IGHV11-2	Unmutated	NA
574	m	2018-06-09	2019-07-02	C57BL/6J Eµ-TCL1	spleen	388	IGHV12-3	Unmutated	NA
576	m	2018-06-09	2019-04-18	C57BL/6J Eµ-TCL1	spleen	313	IGHV1-63	Unmutated	0.377
584	m	2018-08-20	2019-08-05	C57BL/6J Eµ-TCL1	spleen	350	IGHV11-2	Unmutated	0.255
637	f	2018-12-12	2019-11-25	C57BL/6J Eµ-TCL1	spleen	348	IGHV11-2	Unmutated	NA
643	f	2018-12-13	2019-12-20	C57BL/6J Eµ-TCL1	spleen	372	IGHV1-52	Unmutated	0.428
651	f	2018-12-15	2019-09-27	C57BL/6J Eµ-TCL1	spleen	286	IGHV1-55	Unmutated	0.36
687	m	2019-06-13	2020-06-30	C57BL/6J Eµ-TCL1	spleen	383	IGHV11-2	Unmutated	0.236
695	f	2019-06-26	2020-02-26	C57BL/6J Eµ-TCL1	spleen	245	IGHV11-2	Unmutated	0.361
700	m	2019-06-26	2020-08-27	C57BL/6J Eµ-TCL1	spleen	428	IGHV11-2	Unmutated	0.258
701	m	2019-06-26	2020-03-26	C57BL/6J Eµ-TCL1	spleen	274	IGHV12-3	Unmutated	NA
703	m	2019-06-26	2020-07-14	C57BL/6J Eµ-TCL1	spleen	384	IGHV1-26	Unmutated	0.474
717	m	2019-07-17	2020-08-28	C57BL/6J Eµ-TCL1	spleen	408	IGHV7-3	Unmutated	NA
718	m	2019-07-17	2020-04-20	C57BL/6J Eµ-TCL1	spleen	278	IGHV11-2	Unmutated	NA
746	f	2019-12-14	2020-11-12	C57BL/6J Eµ-TCL1	spleen	334	IGHV12-3	Unmutated	NA
758	m	2019-11-30	2020-12-11	C57BL/6J Eµ-TCL1	spleen	377	IGHV11-2	Unmutated	NA
769	m	2020-01-25	2020-12-04	C57BL/6J Eµ-TCL1	spleen	314	IGHV5-16	Unmutated	NA
784	m	2020-05-19	2021-07-26	C57BL/6J Eµ-TCL1	heart blood	433	IGHV1-76	Unmutated	NA
786	m	2020-05-19	2021-04-02	C57BL/6J Eµ-TCL1	spleen	318	IGHV1-55	Unmutated	NA
792	f	2020-06-01	2021-04-02	C57BL/6J Eµ-TCL1	spleen	305	IGHV11-2	Unmutated	0.303
798	f	2020-05-16	2021-04-09	C57BL/6J Eµ-TCL1	heart blood	328	IGHV1-55	Unmutated	0.25
799	f	2020-05-16	2021-04-07	C57BL/6J Eµ-TCL1	heart blood	326	IGHV1-55	Unmutated	0.369
812	f	2020-10-15	2021-08-24	C57BL/6J Eµ-TCL1	spleen	313	IGHV1-55	Unmutated	NA
813	m	2020-10-15	2021-11-09	C57BL/6J Eµ-TCL1	spleen	390	IGHV11-1	Unmutated	0.227
826	m	2020-12-16	2021-12-07	C57BL/6J Eµ-TCL1	spleen	356	IGHV11-2	Unmutated	NA
830	f	2020-12-13	2021-10-18	C57BL/6J Eµ-TCL1	spleen	309	IGHV11-2	Unmutated	1.026
833	f	2020-12-13	2021-11-15	C57BL/6J Eµ-TCL1	spleen	337	IGHV5-9	Unmutated	NA
837	m	2020-12-13	2021-12-02	C57BL/6J Eµ-TCL1	spleen	354	IGHV11-2	Unmutated	0.28
838	f	2021-01-02	2021-08-25	C57BL/6J Eµ-TCL1	spleen	235	IGHV11-1	Unmutated	0.313
B32	f	2012-09-04	2013-09-04	C57BL/6J Eµ-TCL1	heart blood	365	IGHV1-55	Unmutated	0.527
B5	m	2012-06-26	2013-09-04	C57BL/6J Eµ-TCL1	heart blood	435	IGHV11-2	Unmutated	0.236
D14	m	2009-07-21	2010-05-06	C57BL/6J Eµ-TCL1	spleen	289	IGHV11-2	Unmutated	0.149
F21	m	2011-03-31	2012-02-15	C57BL/6J Eµ-TCL1	spleen	321	IGHV12-3	Unmutated	NA
G2	m	2011-05-04	2012-04-03	C57BL/6J Eµ-TCL1	spleen	335	IGHV1-55	Unmutated	0.294

## Sheet: Supplement table 2
Supplement table 2: A list of all wiltype mice used as controls
ID	sex	birthday	sacrifice day	organ	survival (days)
389	m	2016-10-16	2017-10-12	SPL	361
481	f	2017-08-24	2018-06-11	SPL	291
485	m	2017-08-24	2019-08-02	SPL	708
613	f	2019-07-08	2020-02-20	SPL	227
620	f	2019-07-08	2020-02-20	SPL	227
621	f	2019-07-08	2020-02-20	SPL	227
742	m	2019-12-08	2020-11-02	SPL	330
749	f	2019-12-14	2020-11-02	SPL	324

## Sheet: Supplement table 3
Supplement table 3: A list of all longitudinal vBL samples from TCL1 mice
ID	Timepoint	Endpoint
784	2021-06-07	No
784	2021-07-12	No
784	2021-07-26	Yes
784	2021-03-10	No
784	2021-04-09	No
784	2021-05-07	No
786	2021-03-10	No
786	2021-04-02	Yes
792	2021-03-10	No
792	2021-04-02	Yes
798	2021-03-10	No
798	2021-04-09	Yes
799	2021-03-10	No
799	2021-04-07	Yes
812	2021-03-10	No
812	2021-06-07	No
812	2021-07-12	No
812	2021-08-13	No
812	2021-04-09	No
812	2021-05-07	No
813	2021-06-07	No
813	2021-07-12	No
813	2021-08-13	No
813	2021-09-13	No
813	2021-03-10	No
813	2021-04-09	No
813	2021-05-07	No
813	2021-11-08	Yes
826	2021-09-13	No
826	2021-11-15	No
826	2021-12-07	Yes
830	2021-06-07	No
830	2021-07-12	No
830	2021-08-13	No
830	2021-09-13	No
830	2021-03-10	No
830	2021-04-09	No
830	2021-05-07	No
833	2021-06-07	No
833	2021-07-12	No
833	2021-08-13	No
833	2021-09-13	No
833	2021-03-10	No
833	2021-05-07	No
833	2021-11-15	Yes
837	2021-04-09	No
837	2021-07-12	No
837	2021-08-13	No
837	2021-09-13	No
837	2021-03-10	No
837	2021-05-07	No
837	2021-11-15	No
837	2021-12-02	Yes
838	2021-04-09	No
838	2021-06-07	No
838	2021-07-12	No
838	2021-08-13	No
838	2021-03-10	No
838	2021-05-07	No
838	2021-08-25	Yes
864	2021-07-12	No
864	2021-08-13	No
864	2021-09-13	No
864	2021-11-15	No
864	2021-12-13	No
867	2021-07-12	No
867	2021-08-13	No
867	2021-09-13	No
867	2021-11-15	No
867	2021-12-13	No

## Sheet: Supplement table 4
Supplement table 4: A list of all longitudinal vBL samples from WT mice
ID	Timepoint	Endpoint
782	2021-03-10	No
782	2021-04-09	No
782	2021-05-07	No
782	2021-06-07	No
782	2021-07-12	No
782	2021-08-13	No
782	2021-09-13	No
797	2021-04-09	No
797	2021-05-07	No
800	2021-03-10	No
800	2021-04-09	No
806	2021-03-10	No
806	2021-04-09	No
806	2021-05-07	No
808	2021-03-10	No
808	2021-04-09	No
808	2021-05-07	No
808	2021-06-07	No
814	2021-03-10	No
814	2021-04-09	No
814	2021-05-07	No
814	2021-06-07	No
814	2021-07-12	No
814	2021-08-13	No
814	2021-09-13	No
814	2021-11-08	Yes
815	2021-03-10	No
815	2021-04-09	No
815	2021-05-07	No
815	2021-06-07	No
815	2021-07-12	No
815	2021-08-13	No
815	2021-09-13	No
832	2021-04-09	No
832	2021-05-07	No
832	2021-07-12	No
832	2021-08-13	No
832	2021-09-13	No
832	2021-12-13	No
835	2021-04-09	No
835	2021-05-07	No
835	2021-06-07	No
835	2021-07-12	No
835	2021-08-13	No
835	2021-09-13	No
839	2021-04-09	No
839	2021-05-07	No
839	2021-06-07	No
839	2021-07-12	No
839	2021-08-13	No
839	2021-09-13	No
839	2021-11-15	No
839	2021-12-13	No
862	2021-07-12	No
862	2021-08-13	No
862	2021-09-13	No
862	2021-11-15	No
862	2021-12-13	No
863	2021-07-12	No
863	2021-08-13	No
863	2021-09-13	No
863	2021-11-15	No
863	2021-12-13	No
866	2021-07-12	No
866	2021-08-13	No
866	2021-09-13	No
866	2021-12-13	No
869	2021-07-12	No
869	2021-08-13	No
869	2021-09-13	No
869	2021-11-15	No
869	2021-12-13	No

## Sheet: Supplement table 5
Supplement table 5: Flow cyometry data from SPL samples of TCL1 mice (n = 14)
ID	[CD4+] % Gated	[CD8+] % Gated	[CD5+ CD4+ PD1+] % Gated	[CD5+ CD8+ PD1+] % Gated	[CD5+ CD4+ naive T] % Gated	[CD5+ CD4+ Tem] % Gated	[CD5+ CD4+ Tcm] % Gated	[CD5+ CD8+ naive T] % Gated	[CD5+ CD8+ Tem] % Gated	[CD5+ CD8+ Tcm] % Gated	[CD5+CD4+ CD69+] % Gated	[CD5+ CD8+ CD69+] % Gated
449	5.87	67.1	92.63	5.44	1.04	93.59	4.85	0.98	30.94	63.16	9.01	14.38
508	2.53	78.33	96.97	5.74	8.85	78.65	6.16	3.01	29.57	60.04	15.01	28.69
529	7.95	74.46	79.64	1.8	5.14	86.29	6.84	1.4	13.21	82.23	5.65	15.97
354	10.13	72.22	96.29	3.4	11.92	78.32	5.18	3.18	25.75	62.43	5.61	6.78
687	15.28	67.26	97.56	5.13	3.39	91.2	3.42	3.17	34.27	55.31	9.24	5.57
792	10.25	70.59	93.74	11.65	2.67	86.79	8.85	0.38	22.11	71.76	6.56	8.11
G2	1.84	50.77	95.33	55.83	4.49	88.79	3.93	0.59	57.46	31.85	16.45	48.87
521	27.2	48.57	97.2	7.13	0.66	96.72	1.61	0.27	39.8	52.81	28.16	34.59
544	60.74	25.63	98.58	10.63	2.71	89.94	6	4.75	29.27	55.96	4.87	7.72
576	15.14	70.2	96.52	5.58	23.45	66.5	4.68	7.14	26.34	56.27	4.11	11.94
799	15.9	73.7	96.68	7.59	2.58	90.99	4.91	1.57	21.96	71.21	7.69	21
651	22.98	42.26	96.67	17.49	0.58	94.78	4.2	1.1	51.69	38.85	13.19	34.04
798	11.18	64.95	84.21	22.41	1.91	93.3	0.48	0.58	85.75	8.48	9.57	6.34
812	22.51	53.16	95.47	14.4	0.42	95.61	3.12	0.12	61.49	30.77	13.17	21.96
