# Supplementary material for: IGHV1 usage is associated with lymphadenopathy and aggressive disease in the TCL1 mouse model for chronic lymphocytic leukemia
Source: Research Square preprint supplement (doi:10.21203/rs.3.rs-6647193/v1), 2025-07-01
Supplement: Supplementary file 2 [file 5fc9653814b345684aad71f3.docx]

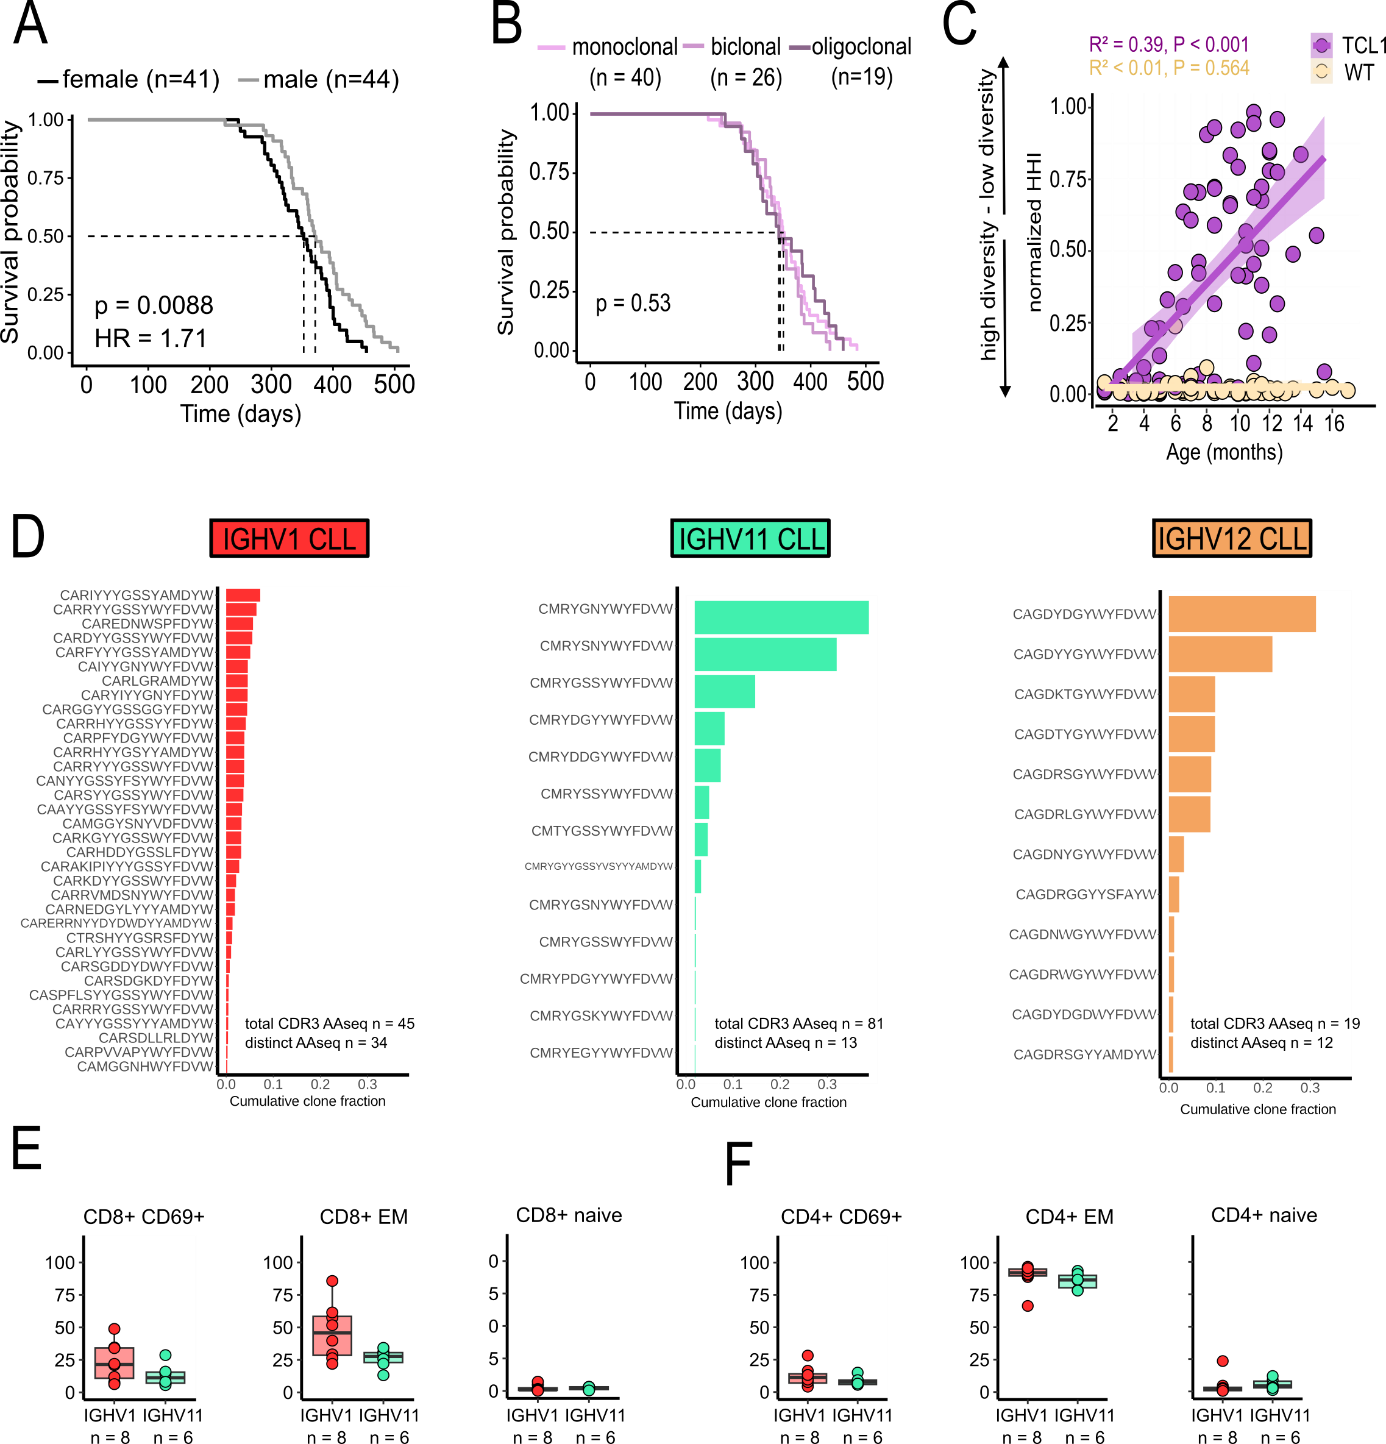


**Supplement Figure 1. (A)** Kaplan-Meier survival curves, grouped by sex (female mice: n =41; male mice: n = 44). **(B)** Kaplan-Meier survival curves based on clonality, including monoclonal (n=40), biclonal (n=26) and oligoclonal (n=19) TCL1 mice. **(C)** Scatter plot comparing changes of BCR-repertoire diversity in WT (n=73 samples) and TCL1 (n= 69 samples) mice over time. **(D)** Bar graph showing cohort specific cumulative clone fraction of distinct aaCDR3 sequences of IGHV groups (IGHV1 n = 45, IGHV11 n = 81, IGHV12 = 19).  **(E + F)** Flow cytometric results for CD8+ and CD4+ T-cell subsets (CD69+, EM and naive) grouped by IGHV gene usage of the dominant CLL clone (IGHV11: n = 6; IGHV1: n = 8). Wilcoxon test was used to compare IGHV11 and IGHV1 data.
